# Supplementary material for: Garlic-derived compound S-allylmercaptocysteine inhibits hepatocarcinogenesis through targeting LRP6/Wnt pathway
Source: PubMed Central journal article supplement — Acta Pharm Sin B. 2017 Nov 10;8(4):575–86. doi: 10.1016/j.apsb.2017.10.003 (PMC6090075; doi:10.1016/j.apsb.2017.10.003), 2017-11-10
Supplement: mmc10.pdf [file mmc10.pdf]

Original article

## Garlic-derived compound S-allylmercaptocysteine inhibits hepatocarcinogenesis through targeting LRP6/Wnt pathway

Jia Xiao<sup>a,b,c,†</sup>, Feiyue Xing<sup>b,†</sup>, Yingxia Liu<sup>a,†</sup>, Yi Lv<sup>b</sup>, Xiaogang Wang<sup>d</sup>, Ming-Tat Ling<sup>f</sup>, Hao Gao<sup>g</sup>, Songying Ouyang<sup>h</sup>, Min Yang<sup>a</sup>, Jiang Zhu<sup>i</sup>, Yu Xia<sup>b</sup>, Kwok-Fai So<sup>e,\*\*</sup>, George L. Tipoe<sup>c,\*</sup>

<sup>a</sup>*State Key Discipline of Infectious Diseases, Shenzhen Third People's Hospital, Shenzhen 518112, China*

<sup>b</sup>*Department of Immunobiology, Institute of Tissue Transplantation and Immunology, Jinan University, Guangzhou 510632, China*

<sup>c</sup>*School of Biomedical Sciences, The University of Hong Kong, Hong Kong, China*

<sup>d</sup>*Department of Cell Biology & Institute of Biomedicine, Jinan University, Guangzhou 510632, China*

<sup>e</sup>*GMH Institute of Central Nervous System Regeneration, Jinan University, Guangzhou 510632, China*

<sup>f</sup>*Australian Prostate Cancer Research Centre-Queensland and Institute of Health and Biomedical Innovation, Queensland University of Technology, Brisbane, Queensland, Australia*

<sup>g</sup>*Institute of Traditional Chinese Medicine and Natural Products, College of Pharmacy, Jinan University 510632, Guangzhou, China*

<sup>h</sup>*Biomedical Research Center of South China, College of Life Sciences, Fujian Normal University, Fuzhou 350117, China*

<sup>i</sup>*JM Medical (Shenzhen), LLC, Shenzhen 518112, China*

Received 24 June 2017; received in revised form 31 August 2017; accepted 8 September 2017

\*Corresponding author. Tel.: +852 3917 9185; fax: +852 2817 0857.

\*\*Corresponding author. Tel./fax: +86 20 8522 3563.

E-mail addresses: [tgeorge@hku.hk](mailto:tgeorge@hku.hk) (George L. Tipoe), [hrmaskf@hku.hk](mailto:hrmaskf@hku.hk) (Kwok-Fai So).

†These authors made equal contributions to this work.

## 1. Supplementary materials and methods

### *S1. Reagents and antibodies*

All cell culture consumables and reagents were bought from either Corning Incorporated (Corning, NY, USA) or Gibco (Carlsbad, CA, USA). All antibodies were purchased from Abcam (Cambridge, UK). SAMC and SAC powders (purity > 95%) were supplied by Wakunaga Pharmaceutical Co., Ltd, Japan.

### *S2. Cell culture, transfection and lentiviral infections*

Hep3B, Huh-7 and LO-2 cell lines were provided by the Cell Bank of Type Culture Collection of Chinese Academy of Sciences (Shanghai, China) and cultured in DMEM with 10% (v/v) FBS at 37 °C with 5% CO<sub>2</sub> using a cell incubator (Shellab, Cornelius, OR, USA). Cells were grown to about 60%–70% confluence before exposing it to treatment. Human *LRP6* gene knockdown was performed as previously described using MISSION<sup>®</sup> *LRP6*-specific lentiviral shRNA (Sigma–Aldrich, St. Louis, MO, USA)<sup>1</sup>. For stable cell line generation, cells were selected in a growth medium containing 2 µg/mL puromycin<sup>2</sup>.

### *S3. Cell viability assay*

The 3-(4,5-dimethyl-thiazol-2-yl)-2,5-diphenyl-tetrazolium bromide (MTT) cell viability assay was conducted as described in previous report<sup>3</sup>. For lactate dehydrogenase (LDH) release assay, cell-free supernatant was collected from different groups of cells after centrifugation. Determination of LDH release was conducted by using a lactic dehydrogenase-based *In vitro* toxicology assay kit (Sigma–Aldrich, St Louis, MO, USA). Results were read at 490 nm

in a micro-plate reader (Bio-Rad).

#### *S4. TCF/LEF reporter luciferase assay*

The activity of  $\beta$ -catenin activity was measured by a luciferase reporter assay of TCF/LEF-dependent transcription with Signal TCF/LEF Reporter Kit (Qiagen, Valencia, CA, USA). *Renilla* luciferase construct was also co-transfected into each well for normalization. The luciferase activity was measured using the Dual-Luciferase Reporter assay system (Promega, Fitchburg, WI, USA).

#### *S5. RNA extraction and quantitative real-time PCR*

RNA extraction, cDNA synthesis, and quantitative PCR were performed as previously described<sup>4</sup>. The primer sequences of human *LRP6* were forward: 5'-TTTATGCAAACAGACGGGACTT-3'; reverse: 5'-GCCTCCAACACTACAATCGTAGC-3'. The annealing temperature of this primer pair was 62 °C. Parallel amplification of glyceraldehyde-3-phosphate dehydrogenase (*GAPDH*) was used as the internal control. All real-time PCR procedures including the design of primers, validation of PCR environment and quantification methods were performed according the MIQE guideline<sup>4</sup>.

#### *S6. Immunofluorescence of cells*

After SAMC incubation, cells were washed thrice with sterile PBS and then immobilized with 4% paraformaldehyde (Sigma–Aldrich) for 10 min on ice and then blocked by PBS containing 1% bovine serum albumin (BSA, Sigma–Aldrich) for 1 h. Antibody of Ki-67 was

then incubated and an appropriate secondary fluorescent antibody was added. Hoechst 33342 was used to visualize the cell nuclei.

#### *S7. Flow cytometry analysis of cell cycle distribution*

After different treatments, cells were scraped off and washed with ice-cold PBS for three times and were centrifuged for 5 min (500xg) at 4 °C. The cells were then fixed in 70% ethanol for 2 h at 4 °C. Samples were rehydrated with PBS and the cells were incubated for 30 min at room temperature with PBS containing 0.2 mg/mL propidium iodide, 0.2 mg/mL DNase-free RNase A (Sigma–Aldrich), and 0.1% Triton X-100 (Fluka, Basel, Switzerland). Four-thousand events were acquired with a FACS SCAN Flow Cytometer (Becton-Dickinson, San Jose, CA, USA) for each sample and the percentage of cells in G0/G1, S and G2/M phases of the cell cycle was determined by the Cell-Quest analytical software (Becton-Dickinson).

#### *S8. Quantification of apoptotic cells and caspase activity*

After drug treatment, Hoechst 33342 (5 µg/mL) and propidium iodide (5 µg/mL) were added to each well to stain live cells. Quantifications of apoptotic ratio and caspase-3/7/8 activity were conducted as previously described<sup>3,5</sup>.

#### *S9. Cell migration and adhesion assay*

The ability of cancer cell migration and adhesion were measured using a Transwell system (8-µm pores, Costar, Cambridge, MA, USA) and a 96-well plate coated with 10 µg/mL

fibronectin (then blocked with 1 µg/mL BSA), respectively. For cell migration assay, cells suspended in serum-free DMEM containing 0.1% bovine serum albumin (BSA) were applied to the upper chamber. DMEM with 20% FBS and 10 µg/mL fibronectin (FN) was added to the lower chamber. After the cells were incubated at 37 °C for 3 h, cells that migrated to the lower side of the upper chamber were stained with hemotoxylin and then counted. For the adhesion assay, cells were washed in serum-free DMEM containing 0.2% trypsin inhibitor and then resuspended in culture medium. An aliquot of 100 µL of suspended cells was added to each well of 96-well plates coated with 10 µg/mL FN and blocked with 1 µg/mL BSA. The plates were incubated for the appropriate periods of time at 37 °C in CO<sub>2</sub> incubator. Non-adherent cells were removed by washing with PBS, and attached cells were analyzed by MTT assay.

#### *S10. Immunohistochemistry of xenografts*

The IHC analysis of tumor xenografts was performed on acetone-fixed 5-µm tissue sections. Hematoxylin and eosin (H&E, Sigma–Aldrich) or antibody of LRP6 was used to stain the sections as previously described<sup>6</sup>.

#### *S11. SAMC labeling and time-lapse fluorescent microscopy*

SAMC (1 mg) and Alexa Fluor 488 TFP ester (100 µg) were dissolved in 2 mL PBS (pH 8.3) and 10 µL of DMSO to prepare 0.5 mg/mL SAMC and 10 µg/µL Alexa Fluor 488 TFP ester stock solutions, respectively. Then 1.6 µL Alexa Fluor 488 TFP ester was dropwise added to 50 µL SAMC solution and the mixtures were stirred for 1 h at room temperature. The

TFP-conjugated SAMC solution was prepared and stored at 4 °C. Huh-7 cells were incubated in 24-well plates (20,000 cells/well) at 37 °C for 24 h without any additional treatment. The medium in the well was replaced with a fresh medium containing 0.125 µmol/L TFP-conjugated SAMC and the Huh-7 cells were incubated for 2 h at 37 °C in a CO<sub>2</sub> incubator. The imaging of Huh-7 cells were observed at different times under a Zeiss Observer D1 fluorescent microscope (Carl Zeiss Corp., Oberkochen, Germany). Cell nucleus was stained using Hoechst 33342 (Sigma–Aldrich).

### S12. Western blot

Western blot analyses of all proteins were performed as described using  $\beta$ -actin as the internal control<sup>7</sup>.

### References for supplementary materials and methods

1. Stewart SA, Dykxhoorn DM, Palliser D, Mizuno H, Yu EY, An DS, et al. Lentivirus-delivered stable gene silencing by RNAi in primary cells. *RNA* 2003;9:493-501.
2. Liu CC, Prior J, Piwnica-Worms D, Bu G. LRP6 overexpression defines a class of breast cancer subtype and is a target for therapy. *Proc Natl Acad Sci U S A* 2010;107:5136-41.
3. Xiao J, Ching YP, Liong EC, Nanji AA, Fung ML, Tipoe GL. Garlic-derived S-allylmercaptocysteine is a hepato-protective agent in non-alcoholic fatty liver disease *in vivo* animal model. *Eur J Nutr* 2013;52:179-91.
4. Bustin SA, Benes V, Garson JA, Hellems J, Huggett J, Kubista M, et al. The MIQE guidelines: minimum information for publication of quantitative real-time PCR experiments. *Clin Chem* 2009;55:611-22.
5. Xiao J, Zhou ZC, Chen C, Huo WL, Yin ZX, Weng SP, et al. Tumor necrosis factor- $\alpha$  gene from mandarin fish, *Siniperca chuatsi*: molecular cloning, cytotoxicity analysis and expression profile. *Mol Immunol* 2007;44:3615-22.
6. Zhou R, Li Z, He C, Li R, Xia H, Li C, et al. Human umbilical cord mesenchymal stem cells and derived hepatocyte-like cells exhibit similar therapeutic effects on an acute liver failure mouse model. *PLoS One* 2014;9:e104392.
7. Zeng W, Xiao J, Zheng G, Xing F, Tipoe GL, Wang X, et al. Antioxidant treatment enhances human mesenchymal stem cell anti-stress ability and therapeutic efficacy in an acute liver failure model. *Sci Rep* 2015;5:11100.

## 2. Supplementary Tables

**Table S1** Clinicopathological characteristics of 48 patients with hepatocellular carcinoma (HCC)

| Characteristics                |           | Number of patients (%) |
|--------------------------------|-----------|------------------------|
| <i>Gender</i>                  | Male      | 40 (83.3%)             |
|                                | Female    | 8 (16.7%)              |
| <i>Age</i>                     | <55 years | 20 (41.7%)             |
|                                | ≥55 years | 28 (58.3%)             |
| <i>Tumor size (diameter)</i>   | <5 cm     | 28 (58.3%)             |
|                                | ≥5 cm     | 20 (41.7%)             |
| <i>Liver cirrhosis history</i> | Yes       | 41 (85.4%)             |
|                                | No        | 7 (14.6%)              |
| <i>TNM stage</i>               | I         | 24 (50.0%)             |
|                                | II        | 10 (20.8%)             |
|                                | III       | 9 (18.8%)              |
|                                | IV        | 5 (10.4%)              |
| <i>Distant metastasis</i>      | M0        | 45 (93.8%)             |
|                                | M1        | 3 (6.2%)               |

**Table S2** Clinicopathologic correlation of *LRP6* transcript in hepatocellular carcinoma (HCC)

patients

| Parameters                   |                   | No <i>LRP6</i> OE | <i>LRP6</i> OE | <i>P</i> value |
|------------------------------|-------------------|-------------------|----------------|----------------|
| <i>Gender</i>                | Male              | 15                | 25             | 0.2395         |
|                              | Female            | 1                 | 7              |                |
| <i>Age</i>                   | <55 years         | 9                 | 11             | 0.2157         |
|                              | ≥55 years         | 7                 | 21             |                |
| <i>Tumor size (diameter)</i> | <5 cm             | 8                 | 20             | 0.5370         |
|                              | ≥5 cm             | 8                 | 12             |                |
| <i>TNM stage</i>             | Early (I&II)      | 13                | 21             | 0.3279         |
|                              | Advanced (III&IV) | 3                 | 11             |                |
| <i>Distant metastasis</i>    | M0                | 16                | 29             | 0.5412         |
|                              | M1                | 0                 | 3              |                |
| <i>β-catenin</i> OE          | Absent            | 10                | 6              | 0.0039         |
|                              | Present           | 6                 | 26             |                |

OE, over-expression. Over-expression of *LRP6* was defined as Cases with tumor/non-tumor (T/NT) ratio more than 2 folds. Over-expression of  $\beta$ -catenin was measured by nuclear or cytoplasmic immunohistochemical staining.

**Table S3** Effects of SAMC on the cell cycle of hepatocarcinoma cell lines

| SAMC ( $\mu\text{mol/L}$ ) | G0/G1           | S               | G2/M            |
|----------------------------|-----------------|-----------------|-----------------|
| Hep3B                      |                 |                 |                 |
| 0                          | 41.6 $\pm$ 1.3  | 43.5 $\pm$ 0.5  | 14.9 $\pm$ 1.1  |
| 250                        | 50.8 $\pm$ 0.9* | 35.3 $\pm$ 0.7* | 13.9 $\pm$ 1.4  |
| 1000                       | 65.0 $\pm$ 2.2* | 21.9 $\pm$ 0.6* | 13.1 $\pm$ 1.5  |
| Huh-7                      |                 |                 |                 |
| 0                          | 42.5 $\pm$ 1.5  | 43.1 $\pm$ 0.7  | 14.4 $\pm$ 1.4  |
| 250                        | 61.0 $\pm$ 1.7* | 19.2 $\pm$ 0.9* | 19.8 $\pm$ 0.8* |
| 1000                       | 52.5 $\pm$ 1.3* | 20.2 $\pm$ 0.8* | 27.3 $\pm$ 1.2* |

Flow cytometry analysis of Hep3B and Huh-7 hepatocarcinoma cells after 24-h treatment with 0, 250, or 1000  $\mu\text{mol/L}$  SAMC. Values are means  $\pm$  SEM. \* $P < 0.05$ , compared with control cells.
